# Supplementary figures and images for: WHO Child Growth Standards in context: The Baby–bod Project - Observational study in Tasmania
Source: HighWire-hosted journal article supplement (doi:10.1136/bmjpo-2021-001123), 2021-06-01

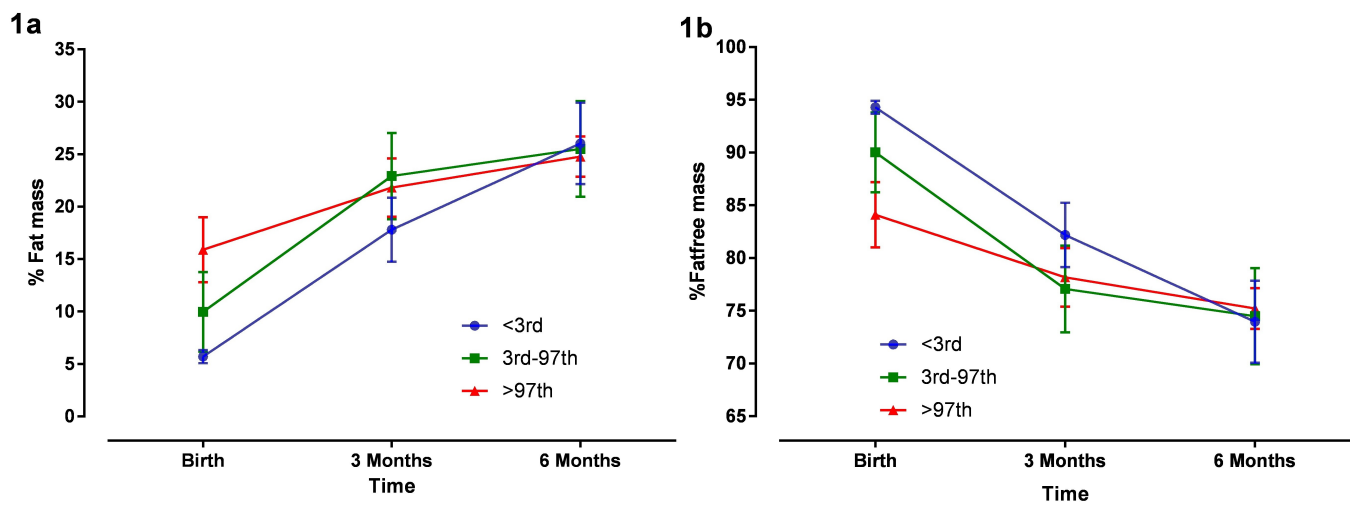

Supplement: bmjpo-2021-001123supp001_data_supplement.pdf [file bmjpo-2021-001123supp001_data_supplement.pdf]
